# Supplementary material
Source: HighWire-hosted journal article supplement (https://www.annfammed.org/highwire/filestream/27049/field_highwire_adjunct_files/0/Botten_Supp_Figs_1-4.pdf)

## **Supplemental materials for**

Botten M, Westfall E. Using a little free library to improve access to mental health and wellness resources at a primary care clinic. *Ann Fam Med*. 2025;23(3):273. doi:10.1370/afm.250004

Supplemental Figures 1-4

**Figure 1: LFL placed outside our primary care clinic.**

---

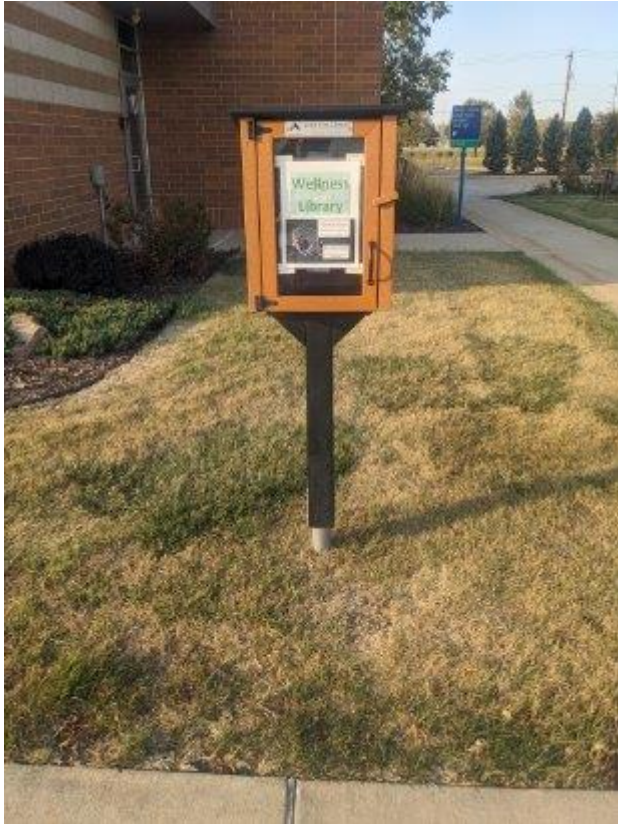

**Figure 2: Front of the LFL door.**

---

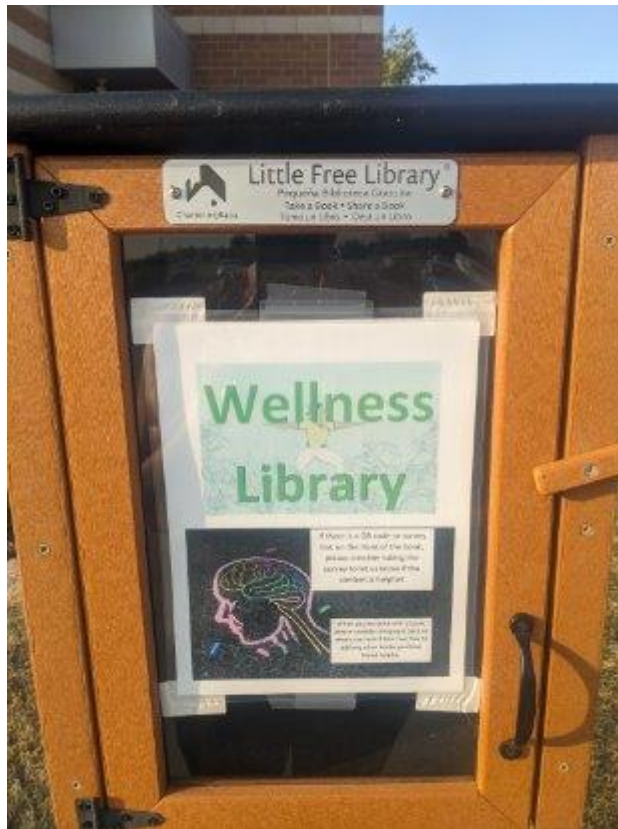

**Figure 3: Inside door of the LFL, local mental health resource handout with QR code to their webpage.**

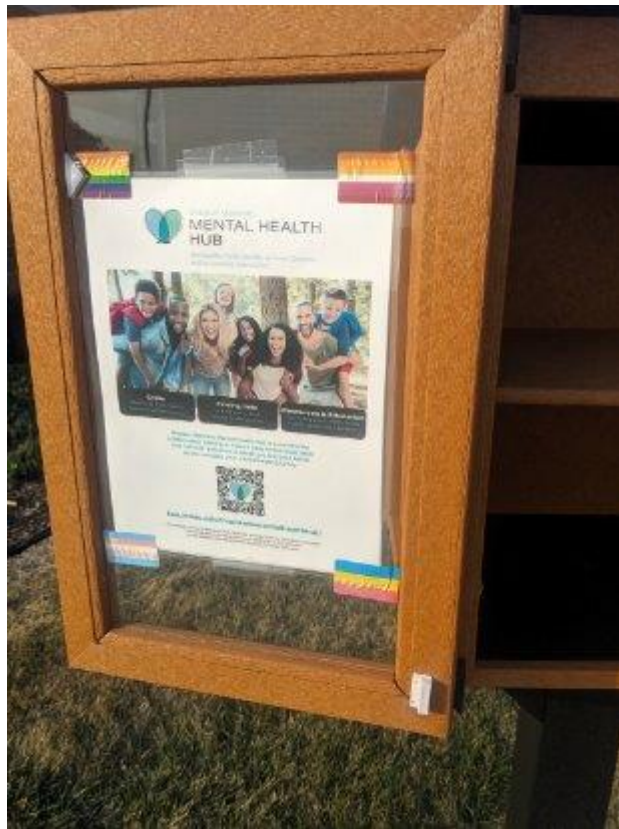

**Figure 4: Magnetic counter placed on the inside door of the library to track how many times the door is opened.**

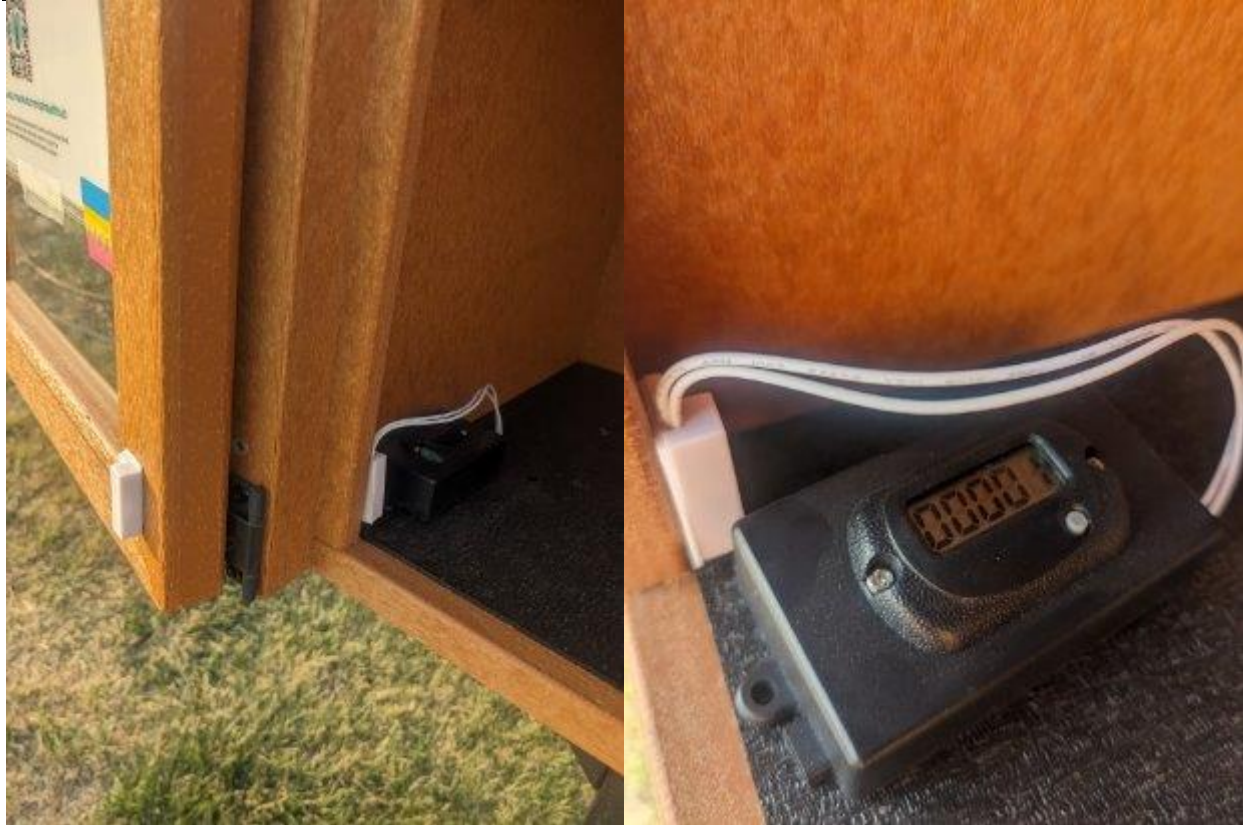

Supplement: Botten_Supp_Figs_1-4.pdf [file Botten_Supp_Figs_1-4.pdf]
